# Supplementary material for: Heterozygous premature termination in zinc-finger domain of Krüppel-like factor 2 gene associates with dysregulated immunity
Source: PubMed Central journal article supplement (PMC9716311; doi:10.3389/fimmu.2022.819929), 2022-11-18

Perna et al. Supplementary material.  
Original images of western blots.

Proteins extracted from fibroblasts.

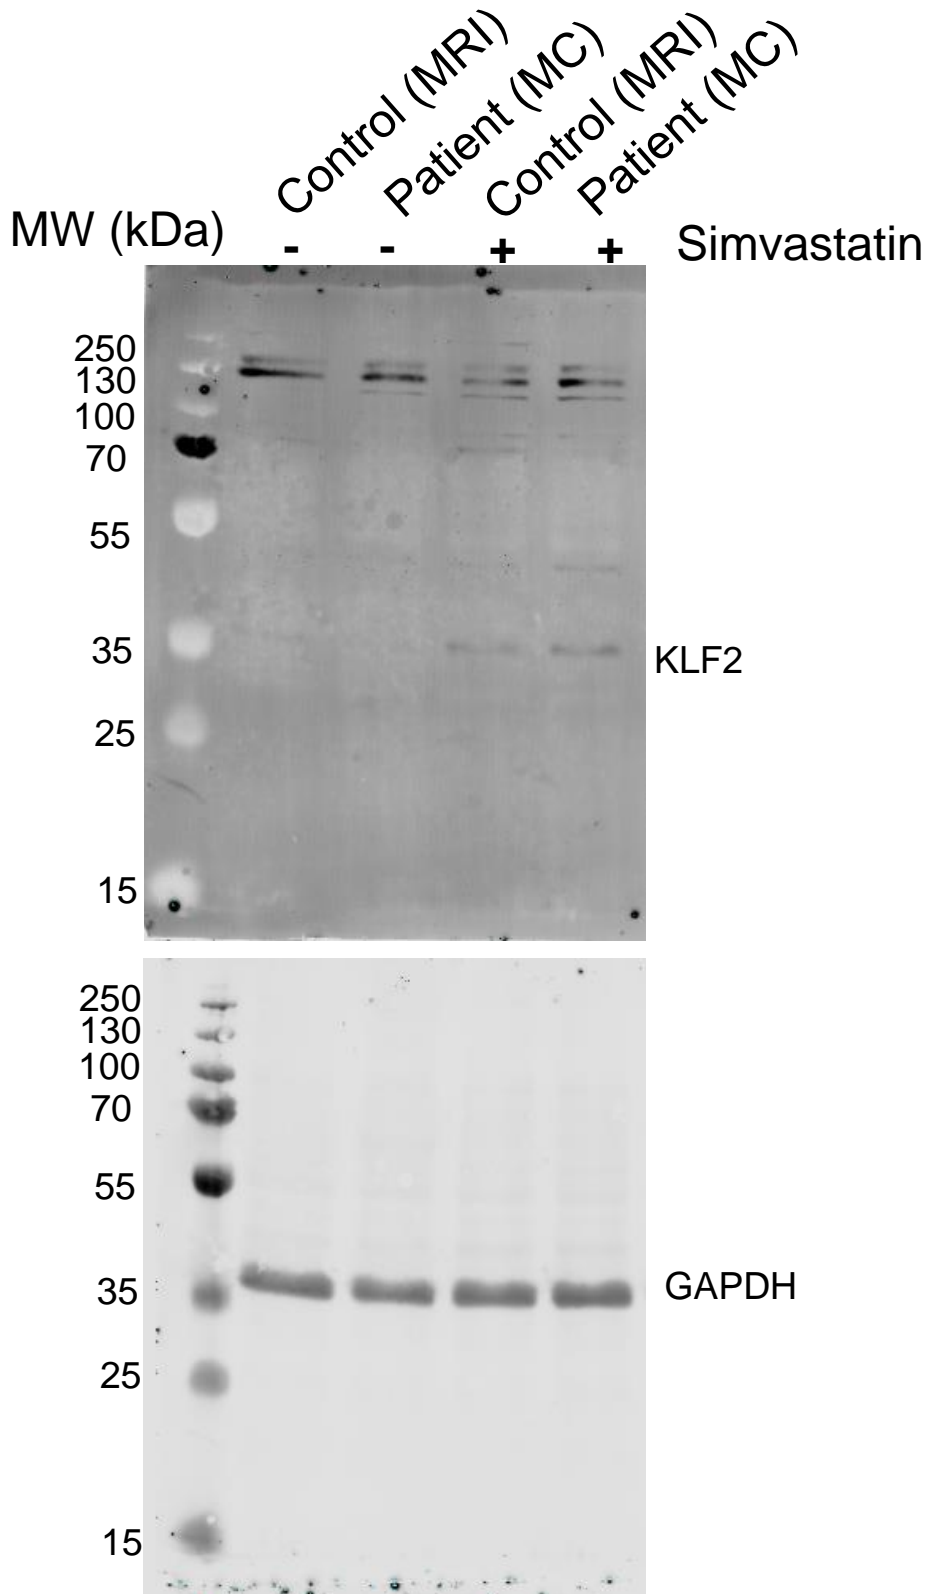



# Proteins extracted from neutrophils

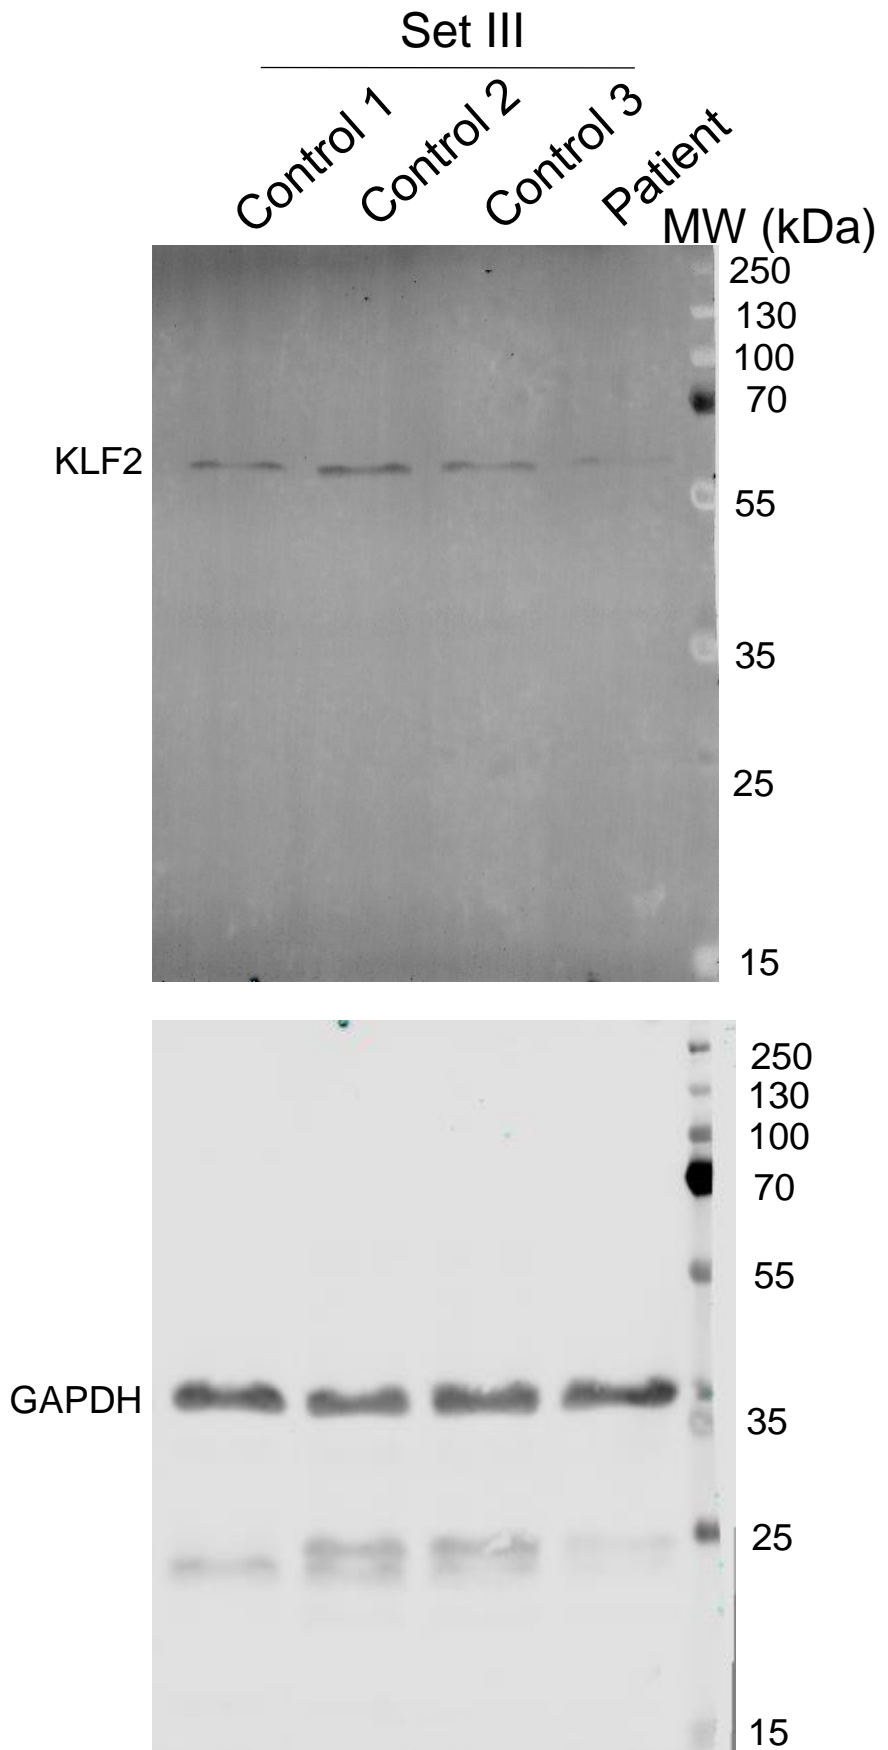

Supplement: DataSheet_1.pdf [file DataSheet_1.pdf]
