# Supplementary material for: Heterozygous premature termination in zinc-finger domain of Krüppel-like factor 2 gene associates with dysregulated immunity
Source: PubMed Central journal article supplement (PMC9716311; doi:10.3389/fimmu.2022.819929), 2022-11-18
Supplement: DataSheet_2.pdf [file DataSheet_2.pdf]

SOURCE Homo sapiens (human)

ORGANISM Homo sapiens

Eukaryota; Metazoa; Chordata; Craniata; Vertebrata; Euteleostomi;

Mammalia; Eutheria; Euarchontoglires; Primates; Haplorrhini;

Catarrhini; Hominidae; Homo.

REFERENCE 1 (bases 1 to 1068)

AUTHORS Perna,N.

TITLE Heterozygous premature termination in zinc-finger domain of  
Kruppel-like factor 2 gene associates with dysregulated immunity

JOURNAL Frontiers in immunology (2022) In press

REFERENCE 2 (bases 1 to 1068)

AUTHORS Perna,N.

TITLE Direct Submission

JOURNAL Submitted (31-OCT-2022) Research Unit of Biomedicine, University of  
Oulu, Aapistie 5A, Oulu, Suomi 90014, Suomi

COMMENT Bankit Comment: ALT EMAIL:timo.hautala@oulu.fi

Bankit Comment: TOTAL # OF SEQS:1

##Assembly-Data-START##

Sequencing Technology :: Sanger dideoxy sequencing

##Assembly-Data-END##

FEATURES Location/Qualifiers

source 1..1068

/organism="Homo sapiens"

/mol\_type="mRNA"

/db\_xref="taxon:9606"

/genotype="Disease causing variant"

gene <1..1068

/gene="Human Kruppel like factor 2"

/allele="disease causing variant"

/note="DOI 10.3389/fimmu.2022.819929"

CDS <1..1068  
/gene="Human Kruppel like factor 2"  
/allele="disease causing variant"  
/note="Human KLF2 disease causing variant"  
/codon\_start=1  
/product="KLF2"  
/translation="MALSEPILPSFSTFASPCRERGLQERWPRAEPESGGTDDDLNSV  
LDFILSMGLDGLGAEAAPEPPPPPPPAFYYPEPGAPPYSAPAGGLVSELLRPELDA  
PLGPALHGRFLLAPPGRVLKAEPEADGGGGYGCAPGLTRGPRGLKREGAPGPAASCM  
RPGGRRPPPPDTPPLSPDGPARLPAPGPRASFPPFFGGPGFGAPGGLHYAPPAPPA  
FGLFDDAAAAAALGLAPPAARGLLTPASPLELLEAKPKRGRRSWPRKRTATHTCYSY  
AGCGKTYTKSSHLKAHLRTHHTGKPYHCNWDGCGWKFARSDELTRHYRKHTGHRPFQC  
HLCDRAFSRSDHLALHMKRHM"

BASE COUNT 132 a 453 c 341 g 142 t

ORIGIN

1 atggcgtga gtgaacccat cctgccgtcc ttctccactt tcgccagccc gtgccgcgag  
61 cgcgccctcg aggagcgtg gccgcgcgcc gaaccgagt ccggcggcac cgacgacgac  
121 ctcaacagcg tgctggactt catcctgtcc atggggctgg atggcctggg cgccgaggcc  
181 gccccggagc cgccgccgcc gccccgccg cctgcgttct attacccga acccgcgcg  
241 cccccccct acagcgcgcc cgcggtggc ctggtgtctg agctgctgcg acccgagctg  
301 gatgcgccgc tggggcccgc actgcacggc cgctttctgc tggcgccgcc cggccgcctg  
361 gtcaaggccg agccccctga agcggacggc ggcgcgct acggctgcgc ccccggctg  
421 acccgtggac cgcgccgct caagcgcgag ggcgccccgg gcccgcgcg ttcgtgcatg  
481 cgaggtcccg gggggcgccc cccgcccg cccgacacac cgccgctcag cccgacggc  
541 cccgcgcgcc tgcccgcgcc cgtccgcgc gcctcctcc cgccgcttt cggcggcct  
601 ggtttcggcg cgccgggccc cggcctgcat tacgcgccg ctgcgcccc agccttcggt  
661 ctctcgacg acgcggcgc cgccgggca gccctggcc tggcgcccc cgccggcgc  
721 ggtctcctca cgccgctgc gtccccgtg gagctgctgg aggccaagcc aaagcggc  
781 cgccgcttt gccccgcaa acgaccgcc actcacact gcagctacg gggctgcggc  
841 aagacctaca ccaagagttc gcatctgaag gcgcatctgc gcacgcacac aggtgagaag  
901 ccctaccact gcaactggga cggctgcggc tggagtttg cgcgctcaga cgagctcacg

961 cgccactacc gaaagcacac gggccaccgg ccattccagt gccatctgtg cgatcgtgcc

1021 ttctcgcgct ccgatcacct ggcgctgcac atgaaacggc acatgtag

//
